# Supplementary material
Source: PubMed Central journal article supplement (PMC4772879)
Supplement: NIHMS718704-supplement-1.pdf [file NIHMS718704-supplement-1.pdf]

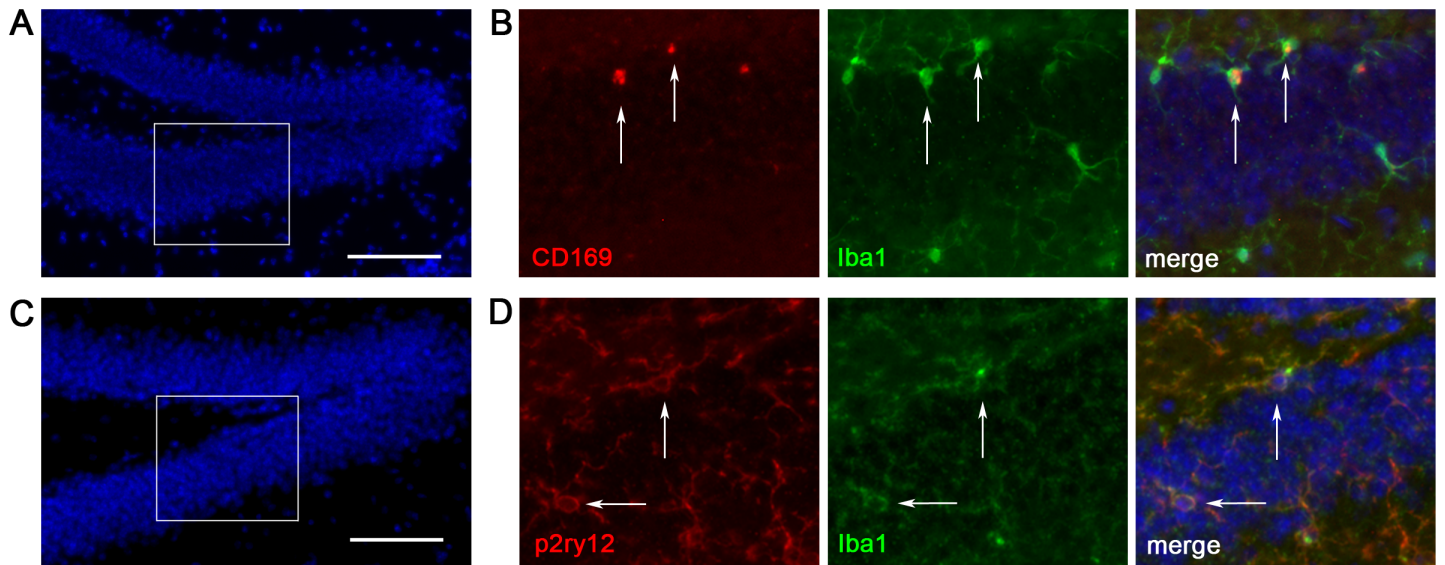

**Figure S1 Both resident microglia and infiltrating peripheral monocytes are present in the SGZ/GCL regions of WT and APP mice.** Iba1<sup>+</sup> cells (green) were assessed for either CD169 (infiltrating monocyte marker, **B**) or p2ry12 (microglia-specific marker, **D**) immunoreactivity in the dentate gyrus. Images depict magnifications of regions outlined in (A) for CD169 (red, **B**) and in (C) for p2ry12 (red, **D**). Scale bars represent 100  $\mu$ m in (A,C).
